# Supplementary material for: Application of Field-of-View Optimized and Constrained Undistorted Single Shot (FOCUS) with Intravoxel Incoherent Motion (IVIM) in 3T in Locally Advanced Rectal Cancer
Source: Hindawi journal article supplement (doi:10.1155/2021/5565902), 2021-03-20

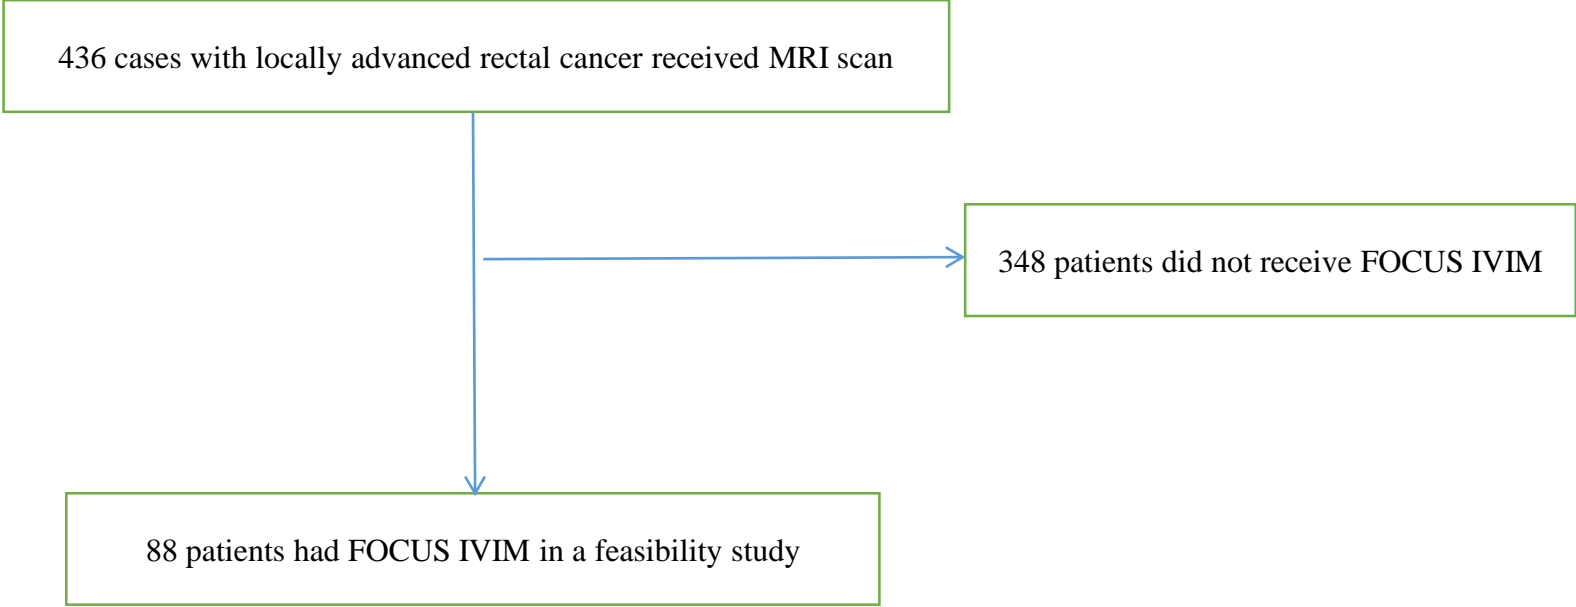

Supplement: f1 [file 5565902.f1.pdf]
